# Supplementary material for: Diversity Analysis and Bioresource Characterization of Halophilic Bacteria Isolated from a South African Saltpan
Source: PubMed Central journal article supplement (PMC6154464; doi:10.3390/molecules22040657), 2017-04-20
Supplement: molecules-22-00657-s001.pdf [file molecules-22-00657-s001.pdf]

**Table S1 Diversity indices of collected water samples from Saltpan**

| <b>Sample ID</b>               | <b>Saltpan</b> |
|--------------------------------|----------------|
| Total number of Sequences      | 3459           |
| Mean Sequences Length (bp)     | 266±54.8       |
| % of sequence with no relative | 23.1           |
| No of OTUs at 0.03             | 2308           |
| Chao-1 at 0.03                 | 6773.34        |
| Shannon index at 0.03          | 7.47           |
| No of OTUs at 0.2              | 683            |
| Chao-1 at 0.2                  | 804.05         |
| Shannon index at 0.2           | 5.41           |

**Table S2 Relative abundance (%) of majorclasses within the phylum**

| <b>Major Classes</b> | <b>% of sequences</b> |
|----------------------|-----------------------|
| Flavobacteriia       | 40.13                 |
| Sphingobacteriia     | 1.21                  |
| Cytophagia           | 0.27                  |
| Cyanobacteria        | 5.58                  |
| Alphaproteobacteria  | 17.96                 |
| Gammaproteobacteria  | 5.19                  |
| Betaproteobacteria   | 1.05                  |
| Deltaproteobacteria  | 1.05                  |
| Actinobacteria       | 15.86                 |
| Planctomycetia       | 9.72                  |
| Deinococci           | 0.44                  |
| Acidobacteria_Gp1    | 0.16                  |
| Acidobacteria_Gp4    | 0.05                  |
| Acidobacteria_Gp3    | 0.11                  |
| Bacilli              | 0.44                  |
| Clostridia           | 0.38                  |
| Erysipelotrichia     | 0.11                  |
| Anaerolineae         | 0.11                  |
| Ktedonobacteria      | 0.05                  |
| Spartobacteria       | 0.05                  |

**Table S3 : Relative abundance (%) of order, family and genus within the phylum**

| <b>Order</b>                       | <b>%</b> | <b>Family</b>                    | <b>%</b> | <b>Genus</b>     | <b>%</b> |
|------------------------------------|----------|----------------------------------|----------|------------------|----------|
| Flavobacteriales                   | 44.37653 | Flavobacteriaceae                | 40.53651 | Salinibacter     | 4.022989 |
| Sphingobacteriales                 | 1.344743 | Rhodothermaceae                  | 1.415797 | Salisaeta        | 0.287356 |
| Cytophagales                       | 0.305623 | Chitinophagaceae                 | 0.223547 | Segetibacter     | 0.287356 |
| Rhodobacterales                    | 10.45232 | Cytophagaceae                    | 0.149031 | GpVII            | 26.72414 |
| Rhodospirillales                   | 4.645477 | Family VII                       | 6.929955 | Rubellimicrobium | 1.724138 |
| Rhizobiales                        | 2.200489 | Rhodobacteraceae                 | 12.74218 | Paracoccus       | 0.287356 |
| Alphaproteobacteria_incertae_sedis | 0.061125 | Rhodospirillaceae                | 3.874814 | Amylibacter      | 0.574713 |
| Sphingomonadales                   | 0.183374 | Acetobacteraceae                 | 1.490313 | Rhodovibrio      | 13.21839 |
| Caulobacterales                    | 0.061125 | Methylobacteriaceae              | 1.043219 | Skermanella      | 1.149425 |
| Chromatiales                       | 4.217604 | Bradyrhizobiaceae                | 0.298063 | Craurococcus     | 0.574713 |
| Oceanospirillales                  | 0.611247 | Beijerinckiaceae                 | 0.149031 | Roseomonas       | 0.287356 |
| Gammaproteobacteria_incertae_sedis | 0.061125 | Rhizobiaceae                     | 0.074516 | Staphylococcus   | 0.287356 |
| Pseudomonadales                    | 0.061125 | Sphingomonadaceae                | 0.223547 | Microvirga       | 2.873563 |
| Burkholderiales                    | 0.91687  | Hyphomonadaceae                  | 0.074516 | Methylobacterium | 0.862069 |
| Hydrogenophilales                  | 0.061125 | Ectothiorhodospiraceae           | 4.918033 | Afipia           | 0.287356 |
| Myxococcales                       | 1.100244 | Halothiobacillaceae              | 0.074516 | Geminicoccus     | 0.287356 |
| Desulfovibrionales                 | 0.061125 | Oceanospirillales_incertae_sedis | 0.298063 | Novosphingobium  | 0.287356 |
| Actinomycetales                    | 16.25917 | Halomonadaceae                   | 0.149031 | Aquisalimonas    | 0.287356 |
| Rubrobacterales                    | 0.122249 | Pseudomonadaceae                 | 0.074516 | Spiribacter      | 9.195402 |
| Solirubrobacterales                | 0.427873 | Oxalobacteraceae                 | 0.819672 | Arhodomonas      | 0.287356 |
| Acidimicrobiales                   | 0.061125 | Burkholderiales_incertae_sedis   | 0.074516 | Salicola         | 1.149425 |
| Nitrospirales                      | 0.061125 | Comamonadaceae                   | 0.074516 | Halovibrio       | 0.574713 |

|                    |          |                      |          |                    |          |
|--------------------|----------|----------------------|----------|--------------------|----------|
| Planctomycetales   | 10.6357  | Hydrogenophilaceae   | 0.074516 | Thiohalorhabdus    | 0.287356 |
| Deinococcales      | 0.488998 | Polyangiaceae        | 0.298063 | Pseudomonas        | 0.287356 |
| Bacillales         | 0.488998 | Myxococcaceae        | 0.149031 | Massilia           | 0.287356 |
| Halanaerobiales    | 0.244499 | Kofleriaceae         | 0.074516 | Noviherbaspirillum | 0.574713 |
| Clostridiales      | 0.183374 | Desulfohalobiaceae   | 0.074516 | Variovorax         | 0.287356 |
| Erysipelotrichales | 0.122249 | Propionibacteriaceae | 1.117735 | Thiobacillus       | 0.287356 |
| Anaerolineales     | 0.122249 | Nocardioideaceae     | 0.670641 | Myxococcus         | 0.574713 |
| Ktedonobacterales  | 0.061125 | Microbacteriaceae    | 1.043219 | Kofleria           | 0.287356 |
|                    |          | Bogoriellaceae       | 0.074516 | Desulfohalobium    | 0.287356 |
|                    |          | Micrococcaceae       | 0.52161  | Friedmanniella     | 1.724138 |
|                    |          | Intrasporangiaceae   | 0.074516 | Nocardioides       | 0.287356 |
|                    |          | Cellulomonadaceae    | 0.074516 | Marmoricola        | 1.436782 |
|                    |          | Micromonosporaceae   | 1.19225  | Aeromicrobium      | 0.287356 |
|                    |          | Nocardiopsaceae      | 0.074516 | Amnibacterium      | 0.287356 |
|                    |          | Pseudonocardiaceae   | 0.149031 | Agrococcus         | 0.574713 |
|                    |          | Geodermatophilaceae  | 3.204173 | Georgenia          | 0.287356 |
|                    |          | Cryptosporangiaceae  | 0.074516 | Citricoccus        | 0.862069 |
|                    |          | Nakamurellaceae      | 0.074516 | Arthrobacter       | 0.574713 |
|                    |          | Kineosporiaceae      | 0.223547 | Cellulomonas       | 0.287356 |
|                    |          | Streptomycetaceae    | 0.074516 | Blastococcus       | 2.011494 |
|                    |          | Nocardiaceae         | 0.149031 | Modestobacter      | 2.873563 |
|                    |          | Mycobacteriaceae     | 0.074516 | Geodermatophilus   | 1.724138 |
|                    |          | Rubrobacteraceae     | 0.149031 | Cryptosporangium   | 0.287356 |
|                    |          | Solirubrobacteraceae | 0.074516 | Motilibacter       | 0.287356 |
|                    |          | Patulibacteraceae    | 0.074516 | Nakamurella        | 0.287356 |

---

|                       |          |                  |          |
|-----------------------|----------|------------------|----------|
| Nitriliruptoraceae    | 0.074516 | Angustibacter    | 0.574713 |
| Planctomycetaceae     | 12.96572 | Streptomyces     | 0.287356 |
| Trueperaceae          | 0.596125 | Gordonia         | 0.287356 |
| Halobacteroidaceae    | 0.298063 | Mycobacterium    | 0.287356 |
| Lachnospiraceae       | 0.074516 | Rubrobacter      | 0.574713 |
| Peptostreptococcaceae | 0.074516 | Solirubrobacter  | 0.287356 |
| Erysipelotrichaceae   | 0.149031 | Patulibacter     | 0.287356 |
| Anaerolineaceae       | 0.149031 | Nitriliruptor    | 0.287356 |
| Thermosporotrichaceae | 0.074516 | Singulisphaera   | 6.321839 |
|                       |          | Gemmata          | 0.574713 |
|                       |          | Aquisphaera      | 3.448276 |
|                       |          | Gimesia          | 0.287356 |
|                       |          | Isosphaera       | 0.287356 |
|                       |          | Truepera         | 2.298851 |
|                       |          | Turcibacter      | 0.574713 |
|                       |          | Anaerolinea      | 0.287356 |
|                       |          | Thermosporothrix | 0.287356 |

---
